# Supplementary material for: A dystrophic Duchenne mouse model for testing human antisense oligonucleotides
Source: PubMed Central journal article supplement (PMC5821388; doi:10.1371/journal.pone.0193289), 2018-02-21

# S1 Fig

A

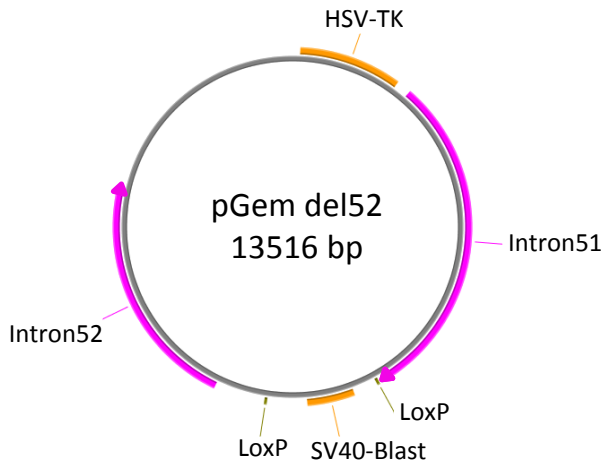

B

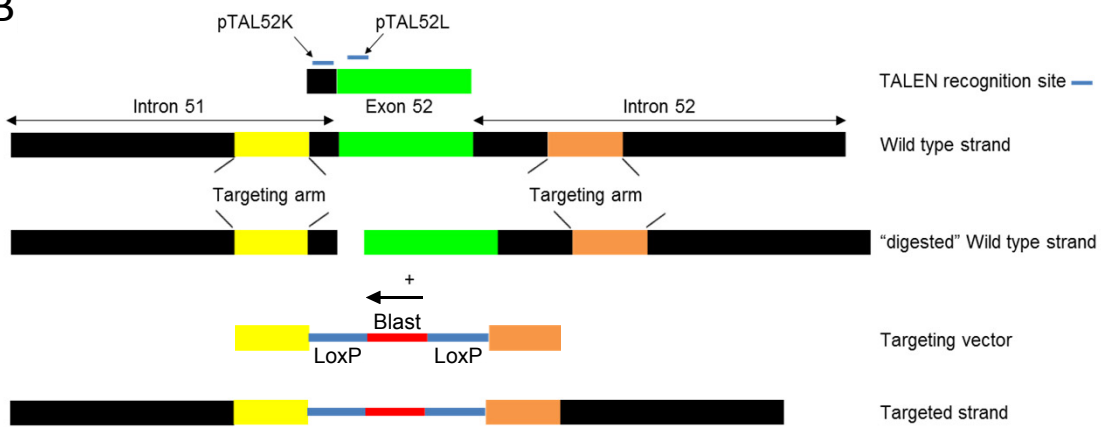

Supplement: pone.0193289.s004.pdf [file pone.0193289.s004.pdf]
